# Supplementary material for: Synergistic enhancement of electrochemical performance of NiFe2O4@Ni-MOF nanoflake hybrids for high-performance energy storage applications
Source: Royal Society of Chemistry journal article supplement (doi:10.1039/d4ta01973c), 2024-01-01
Supplement: d4ta01973c1.pdf [file d4ta01973c1.pdf]

## Supplementary material

# Synergistic Enhancement of Electrochemical Performance in NiFe<sub>2</sub>O<sub>4</sub>@Ni-MOF Nanoflakes Hybrids for High-Performance Energy Storage Applications

*Rabia Batool, Suprimkumar D. Dhas, Avinash C. Mendhe, Aqsa Ghazal, Inkyum Kim, and  
Daewon Kim\**

Department of Electronic Engineering, Institute for Wearable Convergence Electronics, Kyung  
Hee University, 1732 Deogyong-daero, Giheung-gu, Yongin 17104, Republic of Korea

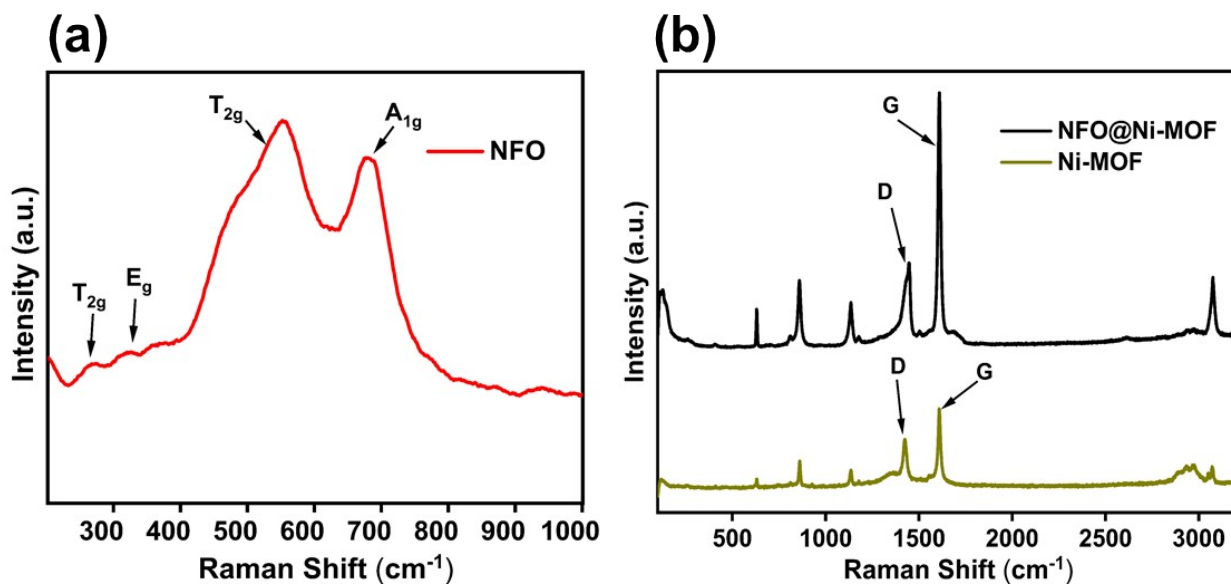

**Figure S1.** Raman spectra of the synthesized (a) NFO nanoflakes (b) Ni-MOF and NFO@Ni-MOF.

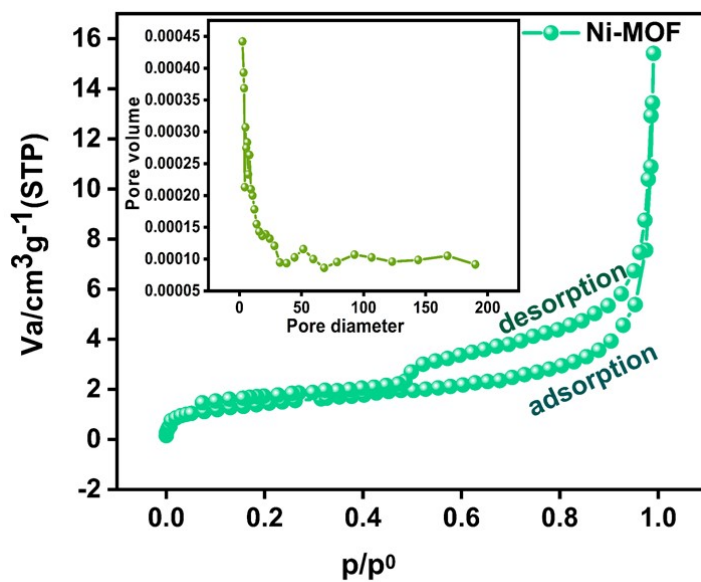

**Figure S2.** N<sub>2</sub> adsorption-desorption isotherms for the Ni-MOF.

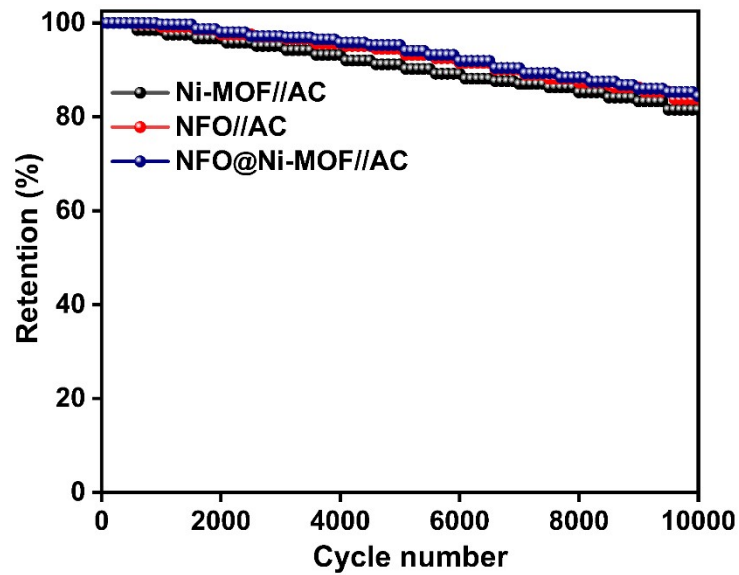

**Figure S3.** Cyclic stability of the NFO//AC, Ni-MOF//AC, and NFO@Ni-MOF//AC, HASCs device.

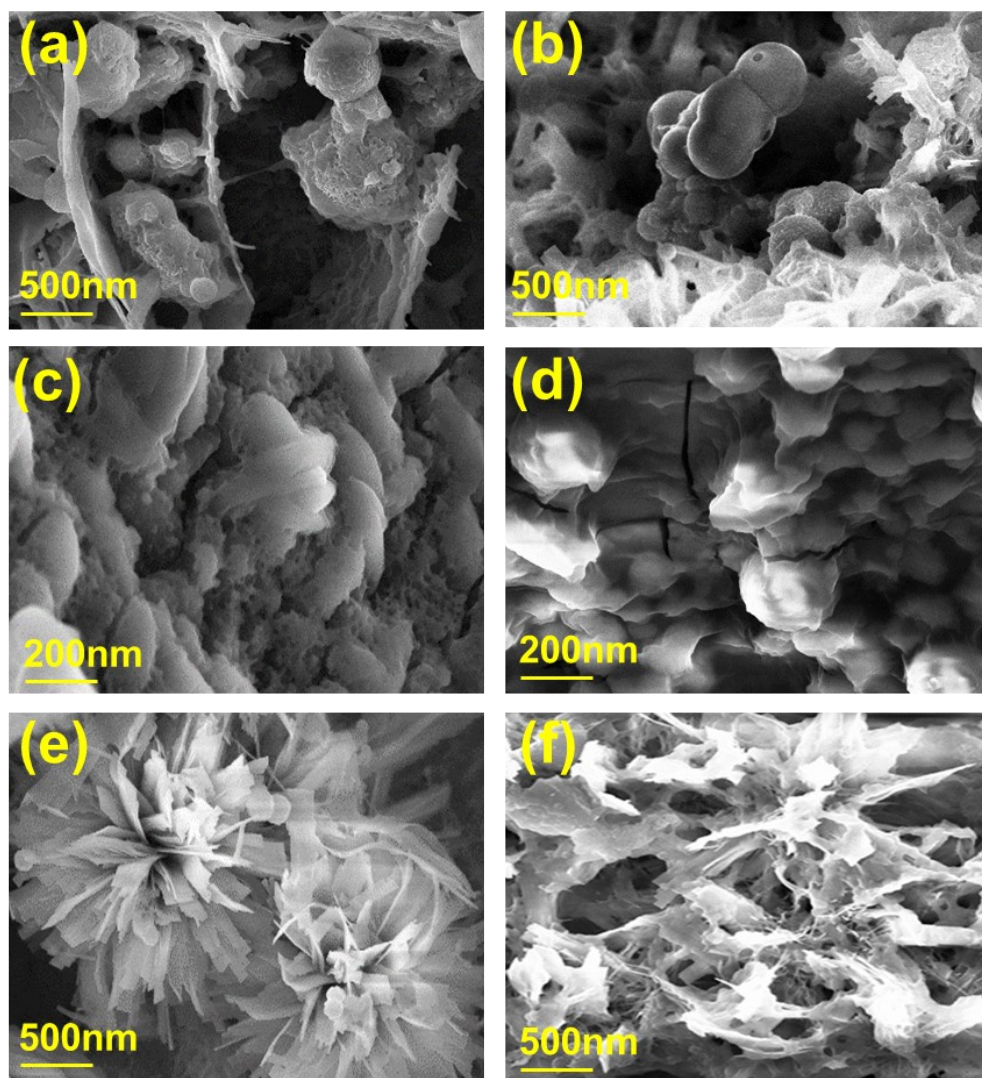

**Figure S4.** FE-SEM of the NFO@Ni-MOF, Ni-MOF and NFO electrodes before (a, c, e) and after (b, d, f) 10000 cycles.

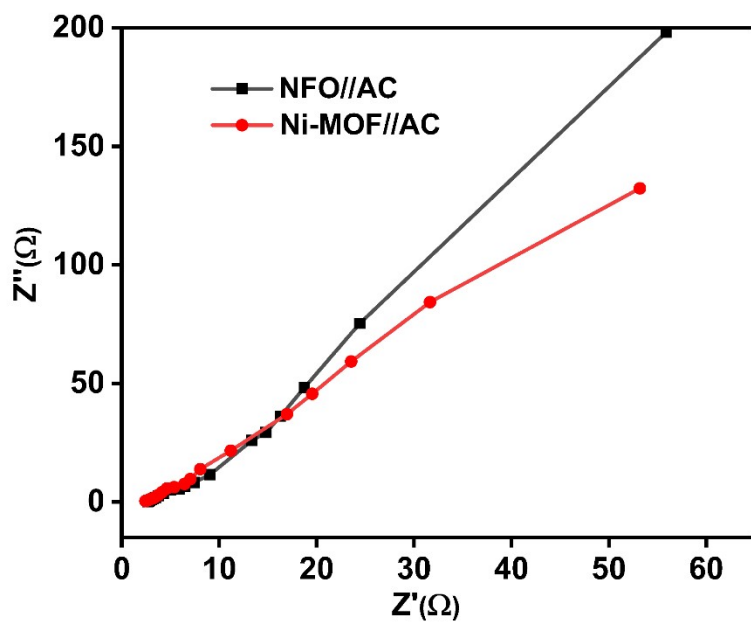

**Figure S5.** EIS plot for NFO//AC, and Ni-MOF//AC HASCs device.
